# Supplementary material for: Autophagy Impairment Is Associated With Increased Inflammasome Activation and Reversal Reaction Development in Multibacillary Leprosy
Source: Front Immunol. 2018 Jun 4;9:1223. doi: 10.3389/fimmu.2018.01223 (PMC5994478; doi:10.3389/fimmu.2018.01223)
Supplement: Supplementary file 3 [file table_1.XLSX]

## Sheet: s1 table
Supplementary materials.
Supplementary Table 1. Baseline characteristics of each multibacillary leprosy patient included in each experiment of the study.
Patient Code Number	Age	Sex	Ridley-Jopling Classification	Leprosy Treatment Status	DBI	DLBI	RBI	RLBI	T1R Onset	Experiment
WR1	32	F	LL	Pretreatment	5.75	5.85	-	-	-	qPCR array, qPCR, WB, ELISA
WR2	48	F	LL	Pretreatment	2.25	3.6	-	-	-	qPCR array, qPCR, WB, ELISA
WR3	65	F	LL	Pretreatment	4.5	4.85	-	-	-	qPCR array, qPCR, WB, ELISA
WR4	58	F	BL	Pretreatment	1.75	3.5	-	-	-	qPCR array, WB, ELISA
WR5	25	M	LL	Pretreatment	3.75	4	-	-	-	IHC*, IF ELISA
WR6	36	M	LL	Pretreatment	5.25	5.85	-	-	-	IHC, IF*, ELISA
WR7	44	M	LL	Pretreatment	4.5	5.6	-	-	-	IHC, IF, ELISA
WR8	34	M	BL	Pretreatment	3.3	3.5	-	-	-	ELISA
WR9	55	F	LL	Pretreatment	5.85	5.85	-	-	-	ELISA
WR10	32	M	LL	Pretreatment	5	5.8	-	-	-	ELISA
T1R1	50	M	BL	Pretreatment	2.75	4.5	0.5	2.8	10th dose	qPCR array, WB, ELISA
T1R2	45	M	LL	Pretreatment	2.75	3.85	3	3.8	12th dose	qPCR array, q PCR, WB, ELISA
T1R3	42	F	BL	Pretreatment	4	4.85	3.25	3.7	8th dose	qPCR array, qPCR, WB, ELISA
T1R4	51	M	BL	Pretreatment	5	3.5	2.75	4.6	12th dose	qPCR array, ELISA
T1R5	31	M	LL	Pretreatment	5.5	5.85	NR	3.8	5th dose	qPCR array, IHC, IF*, ELISA
T1R6	50	F	BL	Pretreatment	1	3.5	NR	0	2nd dose	qPCR array, WB, ELISA
T1R7	66	M	BL	Pretreatment	2.25	4.9	1	3.8	4th dose	qPCR array, ELISA
T1R8	30	F	LL	Pretreatment	4.75	5.95	NR	NR	3rd dose	qPCR array, ELISA
T1R9	28	M	BL	Pretreatment	4.5	3.6	NR	NR	9th dose	qPCR, ELISA
T1R10	43	M	LL	Pretreatment	2.25	4.8	NR	3.7	PT	IHC*, IF, ELISA
TLR11	56	M	LL	Pretreatment	5	4.85	2.5	3.2	3rd dose	IHC, IF, ELISA
TLR12	45	F	LL	Pretreatment	4.25	5.95	NR	2.5	5th dose	IHC, ELISA
WR, without reaction; T1R, type 1 reaction; F, female; M, male; BL,borderline lepromatous; LL, lepromatous leprosy; DBI, diagnostic bacillary index; DLBI, diagnostic logarithmic bacillary index of skin lesion; RBI, reaction bacillary index; RLBI, reaction logarithmic bacillary index of skin lesion; NR, not registered; PT, post leprosy treatment, qPCR, Real Time Polymerase Chain Reaction, WB, West…
